# Supplementary material
Source: Springer Nature journal article supplement (https://www.springermedizin.de/resource/supplementary/12936_2003_46_MOESM7_ESM.pdf/9546746)
Supplement: MOESM7 [file 9546746]

| A          |               | Orientation (transcribed towards) |         |           | DBL1-CIDR1 |       |        | Domain structure |        |        |        |        |        |        |        |        |     |  |  |  |  |  |
|------------|---------------|-----------------------------------|---------|-----------|------------|-------|--------|------------------|--------|--------|--------|--------|--------|--------|--------|--------|-----|--|--|--|--|--|
| Gene       | Location      | 5' region                         | ATS     | 3' region | DBL1       | CIDR1 | DBL2   | C2               | DBL3   | DBL4   | DBL5   | DBL6   | DBL7   | ...    |        |        |     |  |  |  |  |  |
| PFE1640w** | Telomeric     | Telomere                          | upsD    | A         | None       | None  | DBL1-□ | CIDR1-□          | DBL2-□ | C2     | DBL3-□ | DBL4-□ | DBL5-□ | DBL6-□ | DBL7-□ | ...    |     |  |  |  |  |  |
| PFL0030c   | Near telomere | Telomere                          | upsE    | None      | D          | X     | DBL1-x | DBL2-x           | DBL3-x | DBL4-□ | DBL5-□ | DBL6-□ | ATS    |        |        |        |     |  |  |  |  |  |
| PFD1235v   | Near telomere | Telomere                          | upsA    | A         | A          |       | DBL1-□ | CIDR1-□          | DBL2-□ | C2     | DBL3-□ | C2     | DBL4-□ | DBL4-□ | CIDR-□ | ATS    |     |  |  |  |  |  |
| MAL7P1.1   | Telomeric     | Telomere                          | upsA    | A         | A          | A     | DBL1-□ | CIDR1-□          | DBL2-□ | C2     | DBL3-□ | C2     | DBL4-□ | CIDR-□ | ATS    |        |     |  |  |  |  |  |
| PF11_0521  | Telomeric     | Telomere                          | upsA    | A         | A          | A     | DBL1-□ | CIDR1-□          | DBL2-□ | C2     | DBL3-□ | C2     | DBL4-□ | CIDR-□ | ATS    |        |     |  |  |  |  |  |
| PF13_0003  | Near telomere | Telomere                          | upsA    | A         | A          | A     | DBL1-□ | CIDR-□           | DBL2-□ | C2     | DBL3-□ | DBL4-□ | CIDR-□ | DBL5-□ | C2     | ATS    |     |  |  |  |  |  |
| PF08_0141  | Near telomere | Telomere                          | upsA    | A         | A          | A     | DBL1-□ | CIDR-□           | DBL2-□ | C2     | DBL3-□ | DBL4-□ | DBL5-□ | ATS    |        |        |     |  |  |  |  |  |
| PF11_0008  | Near telomere | Telomere                          | upsA    | A         | A          | A     | DBL1-□ | CIDR-□           | DBL2-□ | DBL4-□ | CIDR-□ | DBL4-□ | C2     | ATS    |        |        |     |  |  |  |  |  |
| PFD0020c   | Near telomere | Telomere                          | upsA    | A         | A          | A     | DBL1-□ | CIDR1-□          | DBL2-□ | C2     | DBL3-□ | DBL4-□ | DBL4-□ | CIDR-□ | ATS    |        |     |  |  |  |  |  |
| PFA0015c   | Near telomere | Telomere                          | upsA    | A*        | A          | A     | DBL1-□ | DBL2-□           | ATS    |        |        |        |        |        |        |        |     |  |  |  |  |  |
| MAL6P1.314 | Near telomere | Telomere                          | upsA    | A*        | A          | A     | DBL1-□ | DBL2-□           | ATS    |        |        |        |        |        |        |        |     |  |  |  |  |  |
| PF11820w   | Near telomere | Telomere                          | upsA    | A*        | A          | A     | DBL1-□ | DBL2-□           | ATS    |        |        |        |        |        |        |        |     |  |  |  |  |  |
| PF08_0140  | Near telomere | Centromere                        | upsBsh  | A         | B          | B     | DBL1-□ | CIDR1-□          | DBL2-□ | C2     | DBL3-□ | DBL4-□ | CIDR-□ | ATS    |        |        |     |  |  |  |  |  |
| MAL6P1.316 | Near telomere | Centromere                        | upsBsh* | A         | X          | X     | DBL1-□ | CIDR-□           | DBL2-□ | C2     | DBL3-□ | DBL4-□ | DBL5-□ | ATS    |        |        |     |  |  |  |  |  |
| PFL0020w   | Near telomere | Centromere                        | upsBsh  | X         | X          | B     | DBL1-□ | CIDR-□           | DBL2-□ | C2     | DBL3-□ | DBL4-□ | DBL5-□ | ATS    |        |        |     |  |  |  |  |  |
| MAL6P1.4   | Telomeric     | Centromere                        | upsB    | C         | X          | B     | DBL1-□ | CIDR1-□          | DBL2-□ | C2     | DBL3-□ | DBL4-□ | CIDR-□ | DBL5-□ | DBL6-□ | DBL7-□ | ATS |  |  |  |  |  |
| PF11_0007  | Telomeric     | Centromere                        | upsB    | X         | B          | D     | DBL1-□ | CIDR1-□          | DBL2-□ | CIDR-□ | ATS    |        |        |        |        |        |     |  |  |  |  |  |
| PF08_0142  | Telomeric     | Centromere                        | upsB    | B         | B          | D     | DBL1-□ | CIDR1-□          | DBL2-□ | CIDR-□ | ATS    |        |        |        |        |        |     |  |  |  |  |  |
| PFE0005w   | Telomeric     | Centromere                        | upsB    | B         | B          | D     | DBL1-□ | CIDR1-□          | DBL2-□ | CIDR-□ | ATS    |        |        |        |        |        |     |  |  |  |  |  |
| PFA0005w   | Telomeric     | Centromere                        | upsB    | B         | C          | B     | DBL1-□ | CIDR1-□          | DBL2-□ | CIDR-□ | ATS    |        |        |        |        |        |     |  |  |  |  |  |
| PFA0765c   | Telomeric     | Centromere                        | upsB    | B         | B          | B     | DBL1-□ | CIDR1-□          | DBL2-□ | CIDR-□ | ATS    |        |        |        |        |        |     |  |  |  |  |  |
| PFC1120c   | Telomeric     | Centromere                        | upsB    | B         | B          | B     | DBL1-□ | CIDR1-□          | DBL2-□ | CIDR-□ | ATS    |        |        |        |        |        |     |  |  |  |  |  |
| PFD0005w   | Telomeric     | Centromere                        | upsB    | B         | B          | B     | DBL1-□ | CIDR1-□          | DBL2-□ | DBL4-x | CIDR-□ | ATS    |        |        |        |        |     |  |  |  |  |  |
| PF10005w   | Telomeric     | Centromere                        | upsB    | D         | B          | B     | DBL1-□ | CIDR1-□          | DBL2-□ | CIDR-□ | ATS    |        |        |        |        |        |     |  |  |  |  |  |
| PF13_0364  | Telomeric     | Centromere                        | upsB    | D         | B          | B     | DBL1-□ | CIDR1-□          | DBL2-□ | CIDR-□ | ATS    |        |        |        |        |        |     |  |  |  |  |  |
| PF07_0139  | Telomeric     | Centromere                        | upsB    | D         | B          | B     | DBL1-□ | CIDR1-□          | DBL2-□ | CIDR-□ | DBL3-□ | ATS    |        |        |        |        |     |  |  |  |  |  |
| PFB1055c   | Telomeric     | Centromere                        | upsB    | D         | B          | B     | DBL1-□ | CIDR1-□          | DBL2-□ | CIDR-□ | ATS    |        |        |        |        |        |     |  |  |  |  |  |
| PF10_0406  | Telomeric     | Centromere                        | upsB    | B         | B          | B     | DBL1-□ | CIDR1-□          | DBL2-□ | CIDR-□ | ATS    |        |        |        |        |        |     |  |  |  |  |  |
| PFL0005w   | Telomeric     | Centromere                        | upsB    | B         | B          | B     | DBL1-□ | CIDR1-□          | DBL2-□ | CIDR-□ | ATS    |        |        |        |        |        |     |  |  |  |  |  |
| PFB0010w   | Telomeric     | Centromere                        | upsB    | B         | B          | B     | DBL1-□ | CIDR1-□          | DBL2-□ | ATS    |        |        |        |        |        |        |     |  |  |  |  |  |
| PFC0005w   | Telomeric     | Centromere                        | upsB    | B         | B          | B     | DBL1-□ | CIDR1-□          | DBL2-□ | CIDR-□ | ATS    |        |        |        |        |        |     |  |  |  |  |  |
| PFL2865c   | Telomeric     | Centromere                        | upsB    | B         | B          | B     | DBL1-□ | CIDR1-□          | DBL2-□ | CIDR-□ | ATS    |        |        |        |        |        |     |  |  |  |  |  |
| PFL13_0001 | Telomeric     | Centromere                        | upsB    | B         | B          | B     | DBL1-□ | CIDR1-□          | DBL2-□ | CIDR-□ | ATS    |        |        |        |        |        |     |  |  |  |  |  |
| MAL6P1.1   | Telomeric     | Centromere                        | upsB    | E         | B          | B     | DBL1-□ | CIDR1-□          | DBL2-□ | CIDR-□ | ATS    |        |        |        |        |        |     |  |  |  |  |  |
| PFD1245c   | Telomeric     | Centromere                        | upsB    | X         | C          | B     | DBL1-□ | CIDR1-□          | DBL2-□ | CIDR-□ | ATS    |        |        |        |        |        |     |  |  |  |  |  |
| PF11830c   | Telomeric     | Centromere                        | upsB    | C         | B          | B     | DBL1-□ | CIDR1-□          | DBL2-□ | CIDR-□ | ATS    |        |        |        |        |        |     |  |  |  |  |  |
| PF10_0001  | Telomeric     | Centromere                        | upsB    | C         | B          | B     | DBL1-□ | CIDR1-□          | DBL2-□ | CIDR-□ | ATS    |        |        |        |        |        |     |  |  |  |  |  |
| PFL0935c   | Centromeric   | Telomere                          | upsB    | D         | C          | B     | DBL1-□ | CIDR1-□          | DBL2-□ | CIDR-□ | ATS    |        |        |        |        |        |     |  |  |  |  |  |
| PFD0035c   | Centromeric   | Telomere                          | upsBsh  | C         | C          | C     | DBL1-□ | CIDR1-□          | DBL2-□ | CIDR-□ | ATS    |        |        |        |        |        |     |  |  |  |  |  |
| PFL1955w   | Centromeric   | Telomere                          | upsBsh  | C         | C          | C     | DBL1-□ | CIDR1-□          | DBL2-□ | CIDR-□ | ATS    |        |        |        |        |        |     |  |  |  |  |  |
| PF08_0106  | Centromeric   | Telomere                          | upsBsh  | C         | C          | X     | DBL1-□ | CIDR1-□          | DBL2-□ | CIDR-□ | ATS    |        |        |        |        |        |     |  |  |  |  |  |
| MAL7P1.50  | Centromeric   | Telomere                          | upsBsh  | C         | C          | X     | DBL1-□ | CIDR1-□          | DBL2-□ | CIDR-□ | ATS    |        |        |        |        |        |     |  |  |  |  |  |
| PF08_0103  | Centromeric   | Telomere                          | upsBsh  | B         | C          | X     | DBL1-□ | CIDR1-□          | DBL2-□ | CIDR-□ | ATS    |        |        |        |        |        |     |  |  |  |  |  |
| MAL7P1.55  | Centromeric   | Telomere                          | upsBsh  | B         | C          | C     | DBL1-□ | CIDR1-□          | DBL2-□ | CIDR-□ | ATS    |        |        |        |        |        |     |  |  |  |  |  |
| PF07_0050  | Centromeric   | Telomere                          | upsBsh  | B         | B          | D     | DBL1-□ | CIDR1-□          | DBL2-□ | C2     | DBL3-□ | ATS    |        |        |        |        |     |  |  |  |  |  |
| PFD1005c   | Centromeric   | Telomere                          | upsBsh  | E         | B          | C     | DBL1-□ | CIDR1-□          | DBL2-□ | CIDR-□ | ATS    |        |        |        |        |        |     |  |  |  |  |  |
| PFL1950w   | Centromeric   | Telomere                          | upsB*   | E         | B          | D     | DBL1-□ | CIDR1-□          | DBL2-□ | C2     | DBL3-□ | CIDR-□ | ATS    |        |        |        |     |  |  |  |  |  |
| MAL6P1.252 | Centromeric   | Telomere                          | upsC*   | B         | D          | X     | DBL1-□ | CIDR1-□          | DBL2-□ | C2     | DBL3-□ | CIDR-□ | ATS    |        |        |        |     |  |  |  |  |  |
| MAL7P1.56  | Centromeric   | Telomere                          | upsC*   | C         | B          | D     | DBL1-□ | CIDR1-□          | DBL2-□ | CIDR-□ | ATS    |        |        |        |        |        |     |  |  |  |  |  |
| PF08_0107  | Centromeric   | Telomere                          | upsC*   | X         | B          | D     | DBL1-□ | CIDR1-□          | DBL2-□ | CIDR-□ | ATS    |        |        |        |        |        |     |  |  |  |  |  |
| PFD0995c   | Centromeric   | Telomere                          | upsC    | C         | D          | X     | DBL1-□ | CIDR1-□          | DBL2-□ | CIDR-□ | ATS    |        |        |        |        |        |     |  |  |  |  |  |
| PF07_0049  | Centromeric   | Telomere                          | upsC    | C         | C          | X     | DBL1-□ | CIDR1-□          | DBL2-□ | CIDR-□ | ATS    |        |        |        |        |        |     |  |  |  |  |  |
| PFD0630c   | Centromeric   | Telomere                          | upsC    | C         | C          | C     | DBL1-□ | CIDR1-□          | DBL2-□ | CIDR-□ | ATS    |        |        |        |        |        |     |  |  |  |  |  |
| PFD1000c   | Centromeric   | Telomere                          | upsC    | C         | B          | C     | DBL1-□ | CIDR1-□          | DBL2-□ | CIDR-□ | ATS    |        |        |        |        |        |     |  |  |  |  |  |
| PFD1015c   | Centromeric   | Telomere                          | upsC    | D         | B          | X     | DBL1-□ | CIDR1-□          | DBL2-□ | CIDR-□ | ATS    |        |        |        |        |        |     |  |  |  |  |  |
| PFD0615c   | Centromeric   | Telomere                          | upsC    | C         | X          | X     | DBL1-□ | CIDR1-□          | DBL2-□ | CIDR-□ | ATS    |        |        |        |        |        |     |  |  |  |  |  |
| PF07_0051  | Centromeric   | Telomere                          | upsC    | C         | D          | X     | DBL1-□ | CIDR1-□          | DBL2-□ | CIDR-□ | ATS    |        |        |        |        |        |     |  |  |  |  |  |
| PF07_0048  | Centromeric   | Telomere                          | upsC    | C         | C          | C     | DBL1-□ | CIDR1-□          | DBL2-□ | CIDR-□ | ATS    |        |        |        |        |        |     |  |  |  |  |  |
| PFL1960w   | Centromeric   | Telomere                          | upsC    | C         | C          | X     | DBL1-□ | CIDR1-□          | DBL2-□ | CIDR-□ | ATS    |        |        |        |        |        |     |  |  |  |  |  |
| PFD0625c   | Centromeric   | Telomere                          | upsC    | C         | C          | X     | DBL1-□ | CIDR1-□          | DBL2-□ | CIDR-□ | ATS    |        |        |        |        |        |     |  |  |  |  |  |

  

| B           |                         | 3D7 gene with closest related 5' sequence              |     |           | DBL1-CIDR1 |        |         | Known domain structure |        |        |        |        |        |  |  |  |  |  |
|-------------|-------------------------|--------------------------------------------------------|-----|-----------|------------|--------|---------|------------------------|--------|--------|--------|--------|--------|--|--|--|--|--|
| PIEMP1      | Strain                  | 5' region                                              | ATS | 3' region | DBL1       | CIDR1  | DBL2    | C2                     | DBL3   | DBL4   | CIDR   | ATS    |        |  |  |  |  |  |
| var1 family | 3D7 homologue: PFE1640w | Both 5' region and coding sequences are conserved [42] |     |           |            |        |         |                        |        |        |        |        |        |  |  |  |  |  |
| var2 family | 3D7 homologue: PFL0030c | Both 5' region and coding sequences are conserved [35] |     |           |            |        |         |                        |        |        |        |        |        |  |  |  |  |  |
| AAA75397    | FCR3 MAL6P1.316         | upsBsh*                                                | A   | C         | D          | DBL1-□ | CIDR1-□ | DBL2-□                 | C2     | DBL3-□ | DBL4-□ | CIDR-□ | ATS    |  |  |  |  |  |
| AAA75396    | Dd2 PF07_0050           | upsB                                                   | C   | B         | X          | DBL1-□ | CIDR1-□ | DBL2-□                 | C2     | DBL3-□ | DBL4-□ | CIDR-□ | ATS    |  |  |  |  |  |
| AAA75398    | FCR3 PF07_0139          | upsB                                                   | E   | B         | X          | DBL1-□ | CIDR1-□ | DBL2-□                 | C2     | DBL3-□ | CIDR-□ | ATS    |        |  |  |  |  |  |
| AAD03351    | It PFL2865c             | upsB                                                   | X   | nd.       | nd.        | DBL1-□ | CIDR1-□ | DBL2-□                 | C2     | DBL3-□ | CIDR-□ | DBL4-□ | DBL5-□ |  |  |  |  |  |
| AF193424    | It PF08_0142            | upsB                                                   | X   | nd.       | nd.        | DBL1-□ | CIDR1-□ | DBL2-□                 | C2     | DBL3-□ |        |        |        |  |  |  |  |  |
| AAB60251    | MC -                    | nd.                                                    | B   | B         | D          | DBL1-□ | CIDR1-□ | DBL2-□                 | CIDR-□ | DBL3-□ | DBL4-□ | ATS    |        |  |  |  |  |  |
| AAC05220    | - PFD0005w              | upsB                                                   | B   | nd.       | nd.        | DBL1-□ | CIDR1-□ | DBL2-□                 | C2     | DBL3-□ |        |        |        |  |  |  |  |  |
| AAC47438    | FCR3 PFB1055c           | upsB                                                   | X   | B         | nd.        | DBL1-□ | CIDR1-□ | DBL2-□                 | C2     | DBL3-□ | CIDR-□ | ATS    |        |  |  |  |  |  |
| AAB06961    | It PFL0020w             | upsBsh                                                 | X   | nd.       | nd.        | DBL1-□ | CIDR1-□ | DBL2-□                 | C2     | DBL3-□ | CIDR-□ |        |        |  |  |  |  |  |
| AAA75399    | Dd2 PFD1015c            | upsC                                                   | B   | C         | X          | DBL1-□ | CIDR1-□ | DBL2-□                 | CIDR-□ | ATS    |        |        |        |  |  |  |  |  |
| AAC05730    | FCR3 -                  | nd.                                                    | C   | C         | nd.        | DBL1-□ | CIDR1-□ | DBL2-□                 | CIDR-□ | ATS    |        |        |        |  |  |  |  |  |
